# Supplementary material for: Association between sepsis incidence and regional socioeconomic deprivation and health care capacity in Germany – an ecological study
Source: Springer Nature journal article supplement (doi:10.1186/s12889-021-11629-4), 2021-09-07
Supplement: MOESM3 [file 19640354]

# Supplementary File 3

---

## **Association between sepsis incidence and regional socioeconomic deprivation and health care capacity in Germany – An ecological study**

Dr. Norman Rose<sup>1,2</sup>, Dr. Claudia Matthäus-Krämer<sup>1</sup>, Dr. Daniel Schwarzkopf<sup>2,3</sup>, Prof. André Scherag<sup>4</sup>,  
Dr. Sebastian Born<sup>1,2</sup>, Prof. Konrad Reinhart<sup>5</sup>, Dr. Carolin Fleischmann-Struzek<sup>1,2</sup>

1 Center for Sepsis Control and Care, Jena University Hospital, Bachstraße 18, 07743 Jena, Germany

2 Institute of Infectious Diseases and Infection Control, Jena University Hospital, Am Klinikum 1,  
07747 Jena, Germany

3 Department for Anesthesiology and Intensive Care Medicine, Jena University Hospital,  
Am Klinikum 1, 07740 Jena, Germany,

4 Institute of Medical Statistics, Computer and Data Sciences, Jena University Hospital, Bachstraße  
18, 07743 Jena, Germany

5 Department of Anesthesiology and Intensive Care Medicine, Charité Universitätsmedizin Berlin,  
Charitéplatz 1, 10117 Berlin, Germany

## Statistical Analyses

The simple and multiple negative binomial (NB) regression model was used, with the number of sepsis cases per district as the outcome variable (denoted by the variable  $Y$ ). The NB model was preferred to the standard Poisson Model due to the problem of overdispersion in our data. The logarithm of the number of inhabitants per district was included as an offset variable in the model to adjust for varying population sizes across districts. The NB model with  $k \geq 1$  predictor variables  $X_j$  (with  $j = 1, \dots, k$ ) can be written as

$$E(Y | \mathbf{X}) = \exp\left(\beta_0 + \sum_{j=1}^k \beta_j X_j + \log(N) + \varepsilon\right) \quad (1)$$

The conditional variance function is

$$Var(Y | \mathbf{X}) = E(Y | \mathbf{X}) \left[1 + \theta^{-1} E(Y | \mathbf{X})\right] \quad (2)$$

This parameterization of the model is also referred to as the NB1 model in the literature<sup>1</sup>.  $\theta$  is the dispersion parameter, which is defined as the precision (e.g. the inverse variance) of the exponential function of the random effects term  $\varepsilon$ . Hence  $\theta^{-1} = Var[\exp(\varepsilon)]$ . Note that  $Var[\exp(\varepsilon)]$  approach zero if  $\theta$  approaches infinity. In this case the Poisson regression model results with the equality  $E(Y | \mathbf{X}) = Var(Y | \mathbf{X})$ . We tested for overdispersion by a statistical comparison of the NB model and the more restricted Poisson model using the likelihood ratio test, with the Null hypothesis  $H_0: Var[\exp(\varepsilon)] = 0$  (e.g. no overdispersion). We used the R-function `glm.nb` from the MASS package<sup>2</sup> for fitting the NB model, and the `glm` of the base distribution of R<sup>3</sup> function for estimating the Poisson regression model.

### Pseudo- $R^2$ for the Negative Binomial Regression Models

We provide Nagelkerkes pseudo- $R^2$  as a standardized measure of the strength of the stochastic relationship between the outcome variable  $Y$  (i.e., the incidence) and one or more predictor variables. In our case the computation of the pseudo- $R^2$  was computed based on two likelihood functions. First, likelihood of the NB model with the predictor variables  $X_1, \dots, X_k$  and the offset variable  $\log(N)$ , and second, the NB model that only includes the intercept and the offset variable  $\log(N)$ .

### Estimated Expected Change

The regression coefficients  $\beta_j$  in the NB regression model are differences in the logarithm of the expected numbers of events if the predictor  $X_j$  increases by one unit. As differences at the logarithmic scale are hard to interpret, we converted the regression coefficients to an expected change in the number of cases if the predictor  $X_j$  increases by one unit ( $EC_j$ ). Positive numbers of  $EC_j$  represent an increase in sepsis cases while negative values means that the incidence decreases if  $X_j$  increases. The  $EC_j$  can be derived from Equation 1 with a single predictor variable  $X_j$ :

$$\begin{aligned} E(Y | X_j = x_j + 1) - E(Y | X_j = x_j) &= \exp(\beta_0 + \beta_j(x_j + 1) + \ln(N) + \varepsilon) - \exp(\beta_0 + \beta_j x_j + \ln(N) + \varepsilon) \\ &= \exp(\beta_0 + \beta_j x_j + \beta_j + \ln(N) + \varepsilon) - \exp(\beta_0 + \beta_j x_j + \ln(N) + \varepsilon) \\ &= \exp(\beta_0 + \beta_j x_j + \ln(N) + \varepsilon) \exp(\beta_j) - \exp(\beta_0 + \beta_j x_j + \ln(N) + \varepsilon) \\ &= (\exp(\beta_j) - 1) \exp(\beta_0 + \beta_j x_j + \ln(N) + \varepsilon) \\ &= (\exp(\beta_j) - 1) E(Y | X_j = x_j) \end{aligned} \quad (3)$$

In order to get the  $EC_j$  per 100.000 population units, Equation 3 must be multiplied by 100.000. Note that the term  $\exp(\beta_j) - 1$  is the expected proportional change ( $EPC_j$ ):

$$\exp(\beta_j) - 1 = \frac{E(Y | X_j = x_j + 1) - E(Y | X_j = x_j)}{E(Y | X_j = x_j)} \quad (4)$$

Hence,  $100 \cdot EPC_j$  is the expected percentage change in the number of cases if  $X_j$  increases by one unit. While the  $EPC_j$  is constant for all values  $x_j$ ,  $EC_j$  is a function with different numbers depending on the value  $x_j$ . In order to provide meaningful estimates, we computed  $EC_j$  if the mean  $\bar{x}_j$  of the predictor  $X_j$  increases by one unit:

$$\left[ E(Y | X_j = \bar{x}_j + 1) - E(Y | X_j = \bar{x}_j) \right] = \left( \exp(\beta_j) - 1 \right) E(Y | X_j = \bar{x}_j) \quad (5)$$

Note that the Equations 3 to 5 were derived for the case of the NB regression with one predictor variable  $X_j$ . However, the  $EC_j$  as well as the  $EPC_j$  can also be computed based on partial regression coefficients of a multiple NB regression with  $k \geq 2$  predictor variables. In this case the  $EC_j$  and the  $EPC_j$  are computed under statistical control of the remaining predictor variables  $X_i$ , with  $i \neq j$ , in the model. Therefore we denote these quantities as the adjusted  $EC_j$  and the adjusted  $EPC_j$ . The latter is defined as

$$\exp(\beta_j) - 1 = \frac{E(Y | \mathbf{Z} = \mathbf{z}, X_j = x_j + 1) - E(Y | \mathbf{Z} = \mathbf{z}, X_j = x_j)}{E(Y | \mathbf{Z} = \mathbf{z}, X_j = x_j)}, \quad (6)$$

with  $\mathbf{Z}$  the vector of all covariates  $X_i$ , with  $i \neq j$ . The adjusted  $EPC_j$  is a constant but  $EC_j$  is a function depending not only on  $X_j$  but also from the values of the other predictor variables  $\mathbf{Z}$ . Analogous to the  $EC_j$  we computed the adjusted  $EC_j$  given that the mean  $\bar{x}_j$  of the predictor  $X_j$  increases by one unit and the other predictors are constant at their means  $\mathbf{Z} = \bar{\mathbf{z}}$ . Hence the adjusted  $EC_j$  is defined as

$$\left[ E(Y | \mathbf{Z} = \bar{\mathbf{z}}, X_j = \bar{x}_j + 1) - E(Y | \mathbf{Z} = \bar{\mathbf{z}}, X_j = \bar{x}_j) \right] = \left( \exp(\beta_j) - 1 \right) E(Y | \mathbf{Z} = \bar{\mathbf{z}}, X_j = \bar{x}_j) \quad (7)$$

95% confidence intervals of the estimated  $EPC_j$ , adjusted  $EPC_j$ ,  $EC_j$  and the adjusted  $EC_j$  are obtained by inserting the confidence limits of  $\beta_j$  into Equations 4 to 7.

## References

1. Greene W. Functional forms for the negative binomial model for count data. *Economics Letters*. 2008;99(3):585-590.
2. Venables WN, Ripley BD. *Modern Applied Statistics with S*. 4 ed. New York, NJ: Springer; 2002.
3. *R Core Team*. *R: A language and environment for statistical computing* [computer program]. Vienna, Austria: R Foundation for Statistical Computing; 2019.
